# Supplementary material for: Facile preparation of reduced graphene oxide supported PtNi alloyed nanosnowflakes with high catalytic activity
Source: Royal Society of Chemistry journal article supplement (doi:10.1039/c5ra02681d), 2015-01-01
Supplement: c5ra02681d1.pdf [file c5ra02681d1.pdf]

Electronic Supplementary Information

**Facile preparation of reduced graphene oxide supported PtNi  
alloyed nanosnowflakes with highly catalytic activity**

Pei Song, Jiu-Ju Feng, Shu-Xian Zhong, Su-Su Huang, Jian-Rong Chen, Ai-Jun Wang\*

*College of Chemistry and Life Science, College of Geography and Environmental Science,  
Zhejiang Normal University, Jinhua, 321004, China*

*\*Corresponding author: [ajwang@zjnu.cn](mailto:ajwang@zjnu.cn) (AJW), Tel./Fax: +86 579 82282269.*

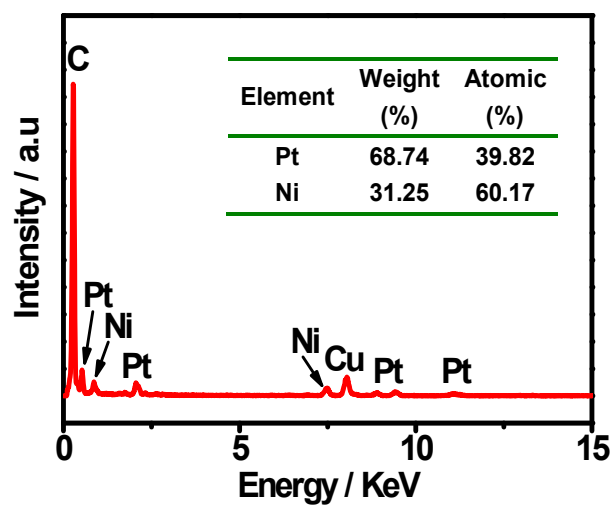

Fig. S1. EDS spectrum of PtNi nanosnowflowers/RGO.

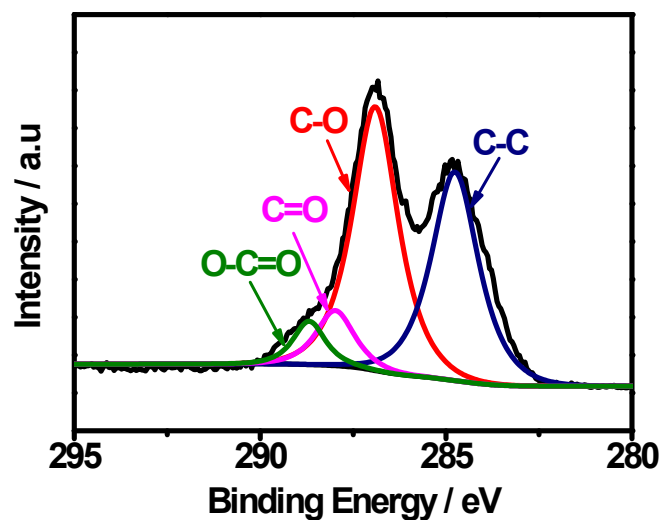

Fig. S2. High-resolution C 1s XPS spectrum of GO.

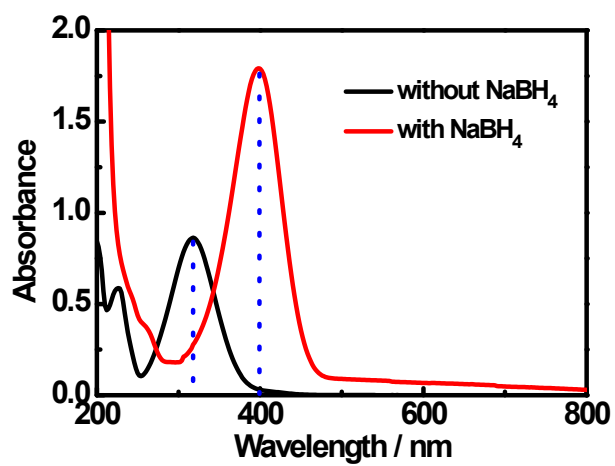

**Fig. S3.** UV-vis spectra of *p*-nitrophenol before and after the addition of NaBH<sub>4</sub>.

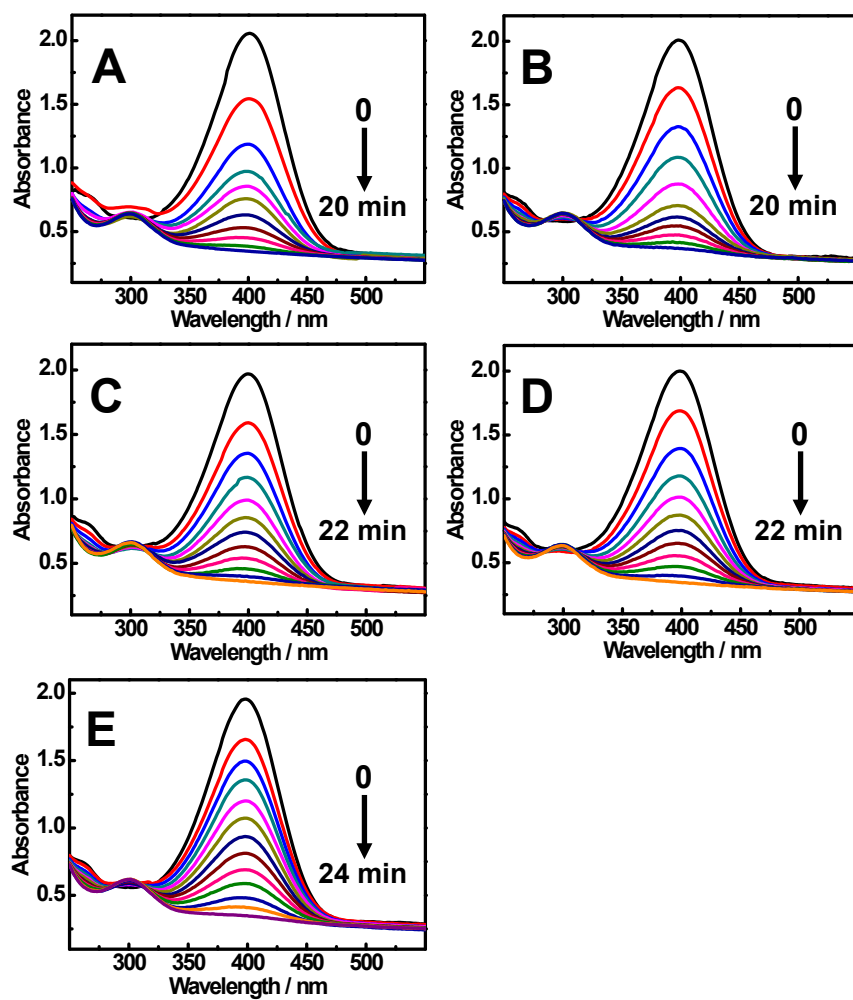

**Fig. S4.** Time-dependent UV-vis absorption spectra showing five cycles of the catalytic reduction of *p*-NP over PtNi nanosnowflowers/RGO catalyst.

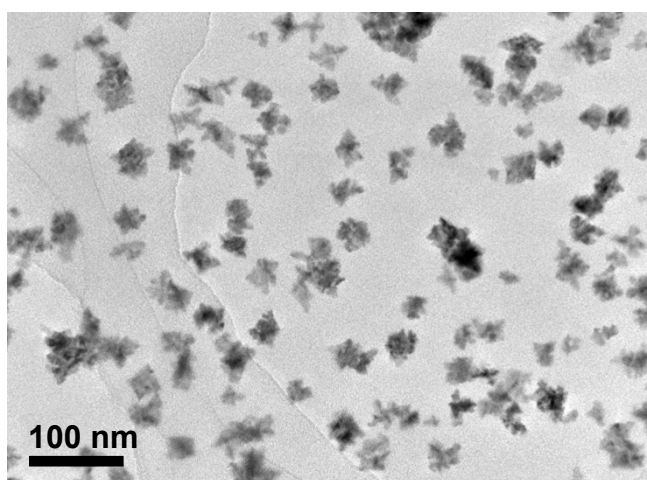

**Fig. S5.** TEM image of PtNi nanosnowflowers/RGO after five recycling tests.
